# Supplementary material
Source: PubMed Central journal article supplement (PMC4189907)
Supplement: supp_ddu297_ddu297supp.pdf [file supp_ddu297_ddu297supp.pdf]

# **SUPPLEMENTAL MATERIAL**

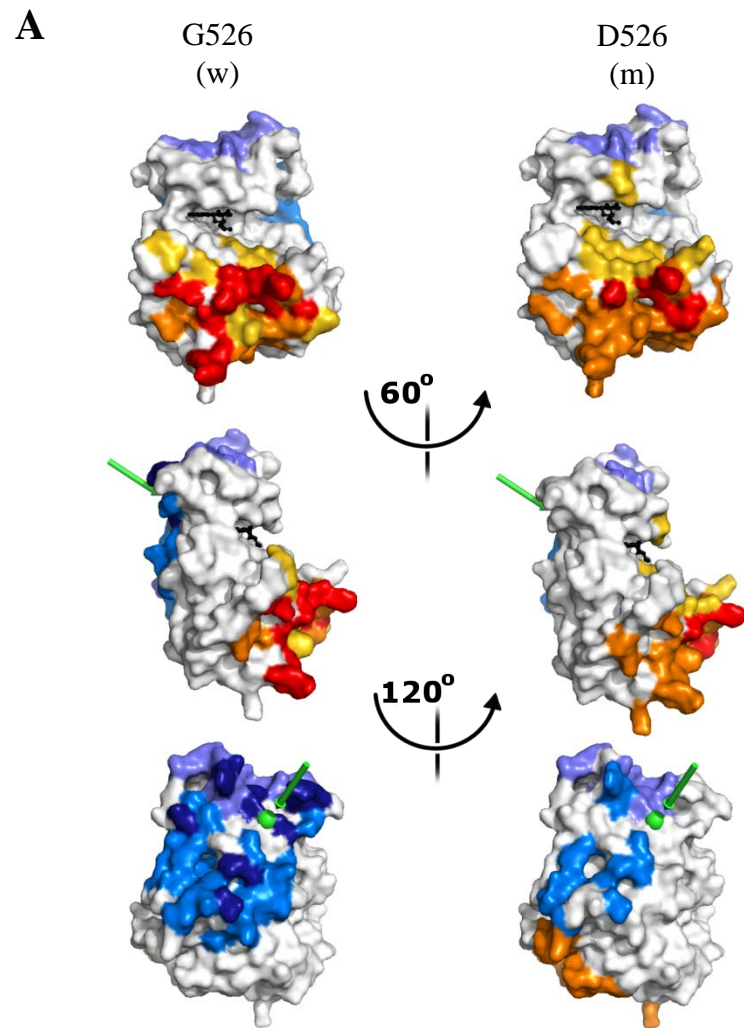

**B**

| Docking Poses |     |     |     |
|---------------|-----|-----|-----|
| Cluster       | w-w | w-m | m-m |
| 1             | 95  | 75  | 133 |
| 2             | 84  | 72  | 108 |
| 3             | 43  | 65  | 47  |
| 4             | 35  | 45  | 47  |
| 5             | 35  | 39  | 47  |
| 6             | 35  | 36  | 41  |
| 7             | 32  | 34  | 40  |
| 8             | 32  | 32  | 35  |
| 9             | 26  | 30  | 30  |
| 10            | 26  | 30  | 26  |

  

|   |     |
|---|-----|
| - | +   |
| + | --  |
| + | ++  |
| - | --- |

**C**

| Orientation of Top 10 Clusters |              |     |     |     |
|--------------------------------|--------------|-----|-----|-----|
| Orientation                    |              | w-w | w-m | m-m |
|                                | head to head | 5   | 4   | 0   |
|                                | body to head | 3   | 4   | 4   |
|                                | body to body | 2   | 2   | 6   |

**Figure S1. Molecular docking of mutant TNNI3K shows alterations in predicted binding interfaces as compared to wild type.** **A**, To examine the predicted impact of the mutation on TNNI3K dimerization, ClusPro docking poses were manually examined for the kinase domains (KDs) of wild type (w) and mutant (m) TNNI3K to determine the binding interfaces. The top 10 poses were mapped into four groups for w-w, w-m and m-m interactions. Two of the four groups utilize the body of the KD as the binding interface (orange and yellow with overlapping residues in red) and two utilize the opposite side of the molecule at the head of the KD (periwinkle and blue with overlapping residues in dark purple). The alpha carbon of residue 526 is shown as a green sphere and an inhibitor bound in the ATP binding site as black sticks. **B**, The presence of each of the 4 binding classes (indicated by color) is summarized for the heterozygous and homozygous mutant docking conditions (w-m and m-m, respectively), relative to w-w. An amplified (+) or diminished (-) presence of the pose upon mutation is shown for each class. **C**, Consolidating the top 10 clusters into the precise orientation of the KDs upon dimerization highlights the direct impact that the mutation has on each pose and the loss of head-to-head interactions in the presence of the D526 mutant.

**Table S1. Cardiac Phenotype of Family Members with TNNI3K-G526D Mutation**

| ID    | Age at diagnosis of arrhythmia, DCM | Rhythm                          | Conduction                                | LV ejection fraction % (age)              | Other findings on initial echo             | Coronary artery disease   | Medical therapy              | Status                 | Cardiac phenotype                        |
|-------|-------------------------------------|---------------------------------|-------------------------------------------|-------------------------------------------|--------------------------------------------|---------------------------|------------------------------|------------------------|------------------------------------------|
| II.2  | 66,71                               | CAF→ AVN ablation, RV-pacing    | LAFB, RBBB                                | 10(71)→25(80) <sup>1</sup>                | Mod. LVE, Sev. RVE, Sev. BAE, Mod.-Sev. MR | Mild LAD                  | Class II, V; ACEI, AA, D, AC | Died at 81 in CHF      | AF, CSD, chronic DCM                     |
| III.1 | 29,60                               | PAF                             | 1° AVB, LAFB, RBBB, EPS: normal SAN & AVN | 40(60)→50(65) <sup>2</sup>                | Mild LVE, Mild LAE; Mild MR                | Normal ECG stress test    | ACEI, D, Class IC, V         | Alive at 66            | AF, CSD, temporary DCM                   |
| III.3 | 36,-                                | PAF                             | 1° AVB, LAE, LPFB, RBBB, PAC's, PVC's     | 55(53)                                    | RVE                                        | No testing                | AC                           | CVA at 53; Alive at 56 | AF, CSD                                  |
| III.4 | 20,39                               | MAT                             | 1° AVB, LAFB, RBBB, PAC's, PVC's          | 45(39)→55(50) <sup>3</sup>                | Mild LVE                                   | Normal coronary angiogram | ACI, Class II                | Alive at 52            | MAT, CSD, temporary DCM (abnl RV biopsy) |
| IV.1  | 13,-                                | MAT→ RFA <sup>4</sup> at age 23 | 1° AVB, LAFB, EPS: normal SAN & AVN       | “mildly reduced” (19)→60(24) <sup>5</sup> | -                                          | No testing                | Class II                     | Alive at 29            | MAT, CSD, temporary DCM                  |
| IV.2  | 14,11                               | EAT; RFA <sup>4</sup> at age 19 | LAFB                                      | 56(11)                                    | Mod. LVE                                   | No testing                | Class IA,V                   | Alive at 26            | EAT, CSD, LVE                            |
| IV.4  | 11,-                                | AFL; RFA <sup>4</sup> at age 11 | RAD, RVH                                  | 63(17)                                    | Mild LAE                                   | No testing                | -                            | Alive at 17            | AFL, CSD                                 |

AA, aldosterone antagonist; AC, anticoagulant; ACEI, angiotensin-converting enzyme inhibitor; AFL, atrial flutter; AVB, atrioventricular block; AVN, atrioventricular node; BAE, biatrial enlargement; BB, beta-receptor blocker; CAF, chronic atrial fibrillation; CHF, congestive heart failure; Class, Vaughan Williams antiarrhythmic drug classification; CSD, cardiac conduction system disease; CVA, cerebrovascular accident; DCM, dilated cardiomyopathy; D, diuretic; EAT, ectopic atrial tachycardia; EF, left ventricular ejection fraction; EPS, invasive electrophysiologic study; LAFB, left anterior fascicular block; LAE, left atrial enlargement; LVE, left ventricular enlargement; MAT, multifocal atrial tachycardia; Mod., moderate; MR, mitral valve regurgitation; PAF, paroxysmal atrial fibrillation; RAD, right axis deviation; RBBB, right bundle branch block; RFA, radiofrequency ablation; RVE, right ventricular enlargement; RVH, right ventricular hypertrophy; SAN, sinoatrial node; Sev., severe.

<sup>1</sup>reverse ventricular remodeling therapy optimized; ventricular rate control with AV node ablation and RV pacing at 70 beats per minute.

<sup>2</sup>blood pressure control optimized; in sinus rhythm on serial evaluation.

<sup>3</sup>reverse ventricular remodeling therapy optimized

<sup>4</sup>right atrial foci

<sup>5</sup>decreased burden of atrial tachycardia

**Table S2. Primer Sequences and Annealing Temperatures for PCR of *TNNI3K* Exons**

| Primer                 | Sequence (5'→3')      | PCR Annealing Temperature (°C) |
|------------------------|-----------------------|--------------------------------|
| <i>TNNI3K</i> Exon 1F  | TGATTAGTTCCTTTATGAT   | 52                             |
| <i>TNNI3K</i> Exon 1R  | TCCGTATACAAATTAACACA  |                                |
| <i>TNNI3K</i> Exon 2F  | TGGGTTCTTCATTAATAACA  | 54                             |
| <i>TNNI3K</i> Exon 2R  | ATGTCTGAGGTTCTACGG    |                                |
| <i>TNNI3K</i> Exon 3F  | ATTCTTCATATAGAGGGTTC  | 54                             |
| <i>TNNI3K</i> Exon 3R  | CTATTAAGCAGCTCAAGTC   |                                |
| <i>TNNI3K</i> Exon 4F  | CAGAGTCAAAATACACAGCA  | 54                             |
| <i>TNNI3K</i> Exon 4R  | AAAAAGCCTAAAGATACACA  |                                |
| <i>TNNI3K</i> Exon 5F  | AGGCAGAAAATCAATACATC  | 54                             |
| <i>TNNI3K</i> Exon 5R  | CCCCAATGTGTTTCAGTAG   |                                |
| <i>TNNI3K</i> Exon 6F  | AAACTGAATCTTAATAGGCA  | 52                             |
| <i>TNNI3K</i> Exon 6R  | AGTAACATGACAACCGTAA   |                                |
| <i>TNNI3K</i> Exon 7F  | TTGTATTAATCAACCCTAGA  | 50                             |
| <i>TNNI3K</i> Exon 7R  | AAGGATTCGCATGTAGG     |                                |
| <i>TNNI3K</i> Exon 8F  | TGGTAGTAGGCAATAGA     | 48                             |
| <i>TNNI3K</i> Exon 8R  | GCATGCCCTAGATTTGA     |                                |
| <i>TNNI3K</i> Exon 9F  | GGAGATACCCCCTTACACCT  | 62                             |
| <i>TNNI3K</i> Exon 9R  | GCCCTACCTCTGCTATTGCT  |                                |
| <i>TNNI3K</i> Exon 10F | AGAGGGCACAATTTAGTTCA  | 56                             |
| <i>TNNI3K</i> Exon 10R | CCTAGTGCTGGCCATAAG    |                                |
| <i>TNNI3K</i> Exon 11F | ATCCTTACTTCATACCTTTG  | 54                             |
| <i>TNNI3K</i> Exon 11R | AGTTGCCTTCTCTGATTAC   |                                |
| <i>TNNI3K</i> Exon 12F | GAGTGCCTGACATAGTGC    | 56                             |
| <i>TNNI3K</i> Exon 12R | CCCCTGAAAGAATGATAGTA  |                                |
| <i>TNNI3K</i> Exon 13F | GCTTGTGCATGACTAGG     | 52                             |
| <i>TNNI3K</i> Exon 13R | AAGGGTAAGGTTAATTATGA  |                                |
| <i>TNNI3K</i> Exon 14F | GATCATTTGGGTTAAGGT    | 50                             |
| <i>TNNI3K</i> Exon 14R | ATTTTATTTCTGCATCGTC   |                                |
| <i>TNNI3K</i> Exon 15F | TATTGGCTCAGGTAACCTA   | 54                             |
| <i>TNNI3K</i> Exon 15R | AGGTATTGGCTCGATAACT   |                                |
| <i>TNNI3K</i> Exon 16F | GAGAAGCATGTGCATGG     | 52                             |
| <i>TNNI3K</i> Exon 16R | TGAAACACAGTTATTAGGCA  |                                |
| <i>TNNI3K</i> Exon 17F | AATTTCTAGCTTAACCTTCA  | 52                             |
| <i>TNNI3K</i> Exon 17R | GTTAGCTGGTGCATCTTA    |                                |
| <i>TNNI3K</i> Exon 18F | GAGGGTTTGTCTAAAGTAGG  | 58                             |
| <i>TNNI3K</i> Exon 18R | AGAGTTTCAAATGTAGGGTC  |                                |
| <i>TNNI3K</i> Exon 19F | ACAGAAGTCTCTTGAGGTT   | 50                             |
| <i>TNNI3K</i> Exon 19R | ACATAAGCCATTATCCC     |                                |
| <i>TNNI3K</i> Exon 20F | TGAGGGCAATATGTATGG    | 52                             |
| <i>TNNI3K</i> Exon 20R | AGATTGTTTGCTTACCTCC   |                                |
| <i>TNNI3K</i> Exon 21F | ATGTCTGCTGATGTTGCTC   | 50                             |
| <i>TNNI3K</i> Exon 21R | CCCGCCTTGACAGTC       |                                |
| <i>TNNI3K</i> Exon 22F | AGAGGGAGACTCAACA      | 50                             |
| <i>TNNI3K</i> Exon 22R | GTAACTTTTTCATAAGCACC  |                                |
| <i>TNNI3K</i> Exon 23F | TAAAATATGGGAAACCTTGG  | 54                             |
| <i>TNNI3K</i> Exon 23R | AAGTTTTTTCAGGGGGTAATC |                                |
| <i>TNNI3K</i> Exon 24F | CAAGGTTATACCGCTAGAA   | 54                             |
| <i>TNNI3K</i> Exon 24R | TCTCCCTTTTTGTCAAATAG  |                                |
| <i>TNNI3K</i> Exon 25F | CTACTCACCAGCAACCGT    | 56                             |
| <i>TNNI3K</i> Exon 25R | GTGGGGAATTAATAGGACA   |                                |
